# Supplementary material for: A Comprehensive Genetic Characterization of Bacterial Motility
Source: PLOS journal article supplement (doi:10.1371/journal.pgen.0030154), 2007-09-11
Supplement: S2 (10.1371/journal.pgen.0030154.s002) [file journal.pgen.0030154.s002]

**Table S2. Array of *z*-scores for the 29 *E. coli* genes containing GGDEF and/or EAL domains after enrichment for non-swimming and non-swarming mutants and after the genome-wide screen for Δ*yhjH* motility.**

**Gene b-Number GGDEFa EALa Swimmingb Swarmingc Δ*yhjH*d Referencese**

*yahA* b0315 ● -21.43 -24.95 -21.30 [1]

*yaiC* b0385 ● -3.37 -5.90 -3.91 [2,3]

*ylaB* b0457 ○ -6.57 -12.60 -12.50

*yliE* b0833 ○ 6.92 2.72 -6.01

*yliF* b0834 ○ -4.12 -5.75 -5.90

*ycdT* b1025 ○ -0.78 -1.69 -0.73

*ycgF* b1163 ● -1.00 -4.78 -4.29 [4]

*ycgG* b1168 ○ -1.09 -2.22 -2.35

*yciR* b1285 ○ ● -8.67 -9.50 -7.67 [3,5]

*ydaM* b1341 ● -2.43 -3.07 -2.53 [3]

*dos* b1489 ○ ● -2.65 -2.37 -3.05 [1,6]

*yddV* b1490 ● 0.84 -6.60 20.90 [7]

*yneF* b1522 ○ -0.07 -1.04 -0.38

*ydeH* b1535 ○ -2.18 -1.53 -3.21

*ydiV* b1707 ○ -4.49 -5.29 -5.29

*yeaI* b1785 ○ -1.82 -2.90 -4.10

*yeaJ* b1786 ● -6.15 -5.71 -6.01 [5]

*yeaP* b1794 ○ -3.88 -4.47 -4.39

*yoaD* b1815 ● -4.09 -3.93 -1.85 [8]

*yedQ* b1956 ● -4.23 -4.51 -3.56 [9]

*yegE* b2067 ● ○ -6.09 -5.27 1516.55 [5]; This study

*rtn* b2176 ○ -1.09 -3.05 -2.87

*yfeA* b2395 ○ ○ 0.26 -3.32 -1.98

*yfgF* b2503 ○ ● -1.79 -1.85 6.23 This study

*yfiN* b2604 ● -1.77 -1.88 2.53 This study

*yhdA* b3252 ○ ○ -0.49 -3.33 -2.86

*yhjH* b3525 ● 120.94 1.84 -7.26 [10]; This study

*yhjK* b3529 ○ ○ -1.28 0.30 -1.94

*yjcC* b4061 ○ -3.64 -4.88 2.34

a Open circles indicate sequence similarity to GGDEF/EAL domains but whose enzymatic activity have yet to be reported; closed circles denote genes whose GGDEF/EAL domains have been shown experimentally through enzymatic or phenotypic assays (either directly or indirectly) to be active in *E. coli* or *S. enterica*.

b Values are z-scores for the first replicate for swimming motility (Dataset S2).

c Values are z-scores for the first replicate for swarming motility (Dataset S7).

d Values are z-scores obtained for suppressors of the *yhjH* motility defect (Dataset S13).

e References refer to studies in which the GGDEF/EAL domains in the corresponding gene have been shown experimentally to show activity.

1. Schmidt AJ, Ryjenkov DA, Gomelsky M (2005) The ubiquitous protein domain EAL is a cyclic diguanylate-specific phosphodiesterase: enzymatically active and inactive EAL domains. J Bacteriol 187: 4774-4781.

2. Römling U, Rohde M, Olsen A, Normark S, Reinkoster J (2000) AgfD, the checkpoint of multicellular and aggregative behaviour in *Salmonella typhimurium* regulates at least two independent pathways. Mol Microbiol 36: 10-23.

3. Weber H, Pesavento C, Possling A, Tischendorf G, Hengge R (2006) Cyclic-di-GMP-mediated signalling within the sigma network of *Escherichia coli*. Mol Microbiol 62: 1014-1034.

4. Hasegawa K, Masuda S, Ono TA (2006) Light induced structural changes of a full-length protein and its BLUF domain in YcgF(Blrp), a blue-light sensing protein that uses FAD (BLUF). Biochemistry 45: 3785-3793.

5. García B, Latasa C, Solano C, García-del Portillo F, Gamazo C, et al. (2004) Role of the GGDEF protein family in *Salmonella* cellulose biosynthesis and biofilm formation. Mol Microbiol 54: 264-277.

6. Sasakura Y, Hirata S, Sugiyama S, Suzuki S, Taguchi S, et al. (2002) Characterization of a direct oxygen sensor heme protein from *Escherichia coli*. Effects of the heme redox states and mutations at the heme-binding site on catalysis and structure. J Biol Chem 277: 23821-23827.

7. Mendéz-Ortiz MM, Hyodo M, Hayakawa Y, Membrillo-Hernández J (2006) Genome-wide transcriptional profile of *Escherichia coli* in response to high levels of the second messenger 3',5'-cyclic diguanylic acid. J Biol Chem 281: 8090-8099.

8. Brombacher E, Baratto A, Dorel C, Landini P (2006) Gene expression regulation by the Curli activator CsgD protein: modulation of cellulose biosynthesis and control of negative determinants for microbial adhesion. J Bacteriol 188: 2027-2037.

9. Da Re S, Ghigo JM (2006) A CsgD-independent pathway for cellulose production and biofilm formation in *Escherichia coli*. J Bacteriol 188: 3073-3087.

10. Simm R, Morr M, Kader A, Nimtz M, Römling U (2004) GGDEF and EAL domains inversely regulate cyclic di-GMP levels and transition from sessility to motility. Mol Microbiol 53: 1123-1134.
