# Supplementary material for: A Comprehensive Genetic Characterization of Bacterial Motility
Source: PLOS journal article supplement (doi:10.1371/journal.pgen.0030154), 2007-09-11
Supplement: S5 (10.1371/journal.pgen.0030154.s005) [file journal.pgen.0030154.s005]

**Table S5. Oligonucleotides**

**Oligonucleotide Sequence (5’ to 3’)**

**Primers designed to create the Y-linker**

YCG5 actacgcacgcgacgagacgtagcgtc (HPLC purified)

YCG3 cggacgctacgtccgtgttgtcggtcctg (HPLC purifed; 5’ phosphorylated)

**Primers designed to PCR amplify the regions adjacent to a transposon insertion. T7PCR anneals to the transposon, and YCGPCR-HG anneals to the complement of the Y-linker.**

T7PCR ACACCTAACCGCTAGCACGTAATACGACTC

YCGPCR-HG ACTACGCACGCGACGAGACG

**Primers designed to amplify *flhDC* , *rcsC*, and *yfgF* for cloning in pBAD18 (adding *Eco*R1 site [5’] and *Hin*dIII site [3’]). Target homology is underlined and restriction sites are in bold.**

*flhDC*-F-*Eco*R1 AAGGAAAAAA**GAATTC**gtgggaataatgcatacctcc

*flhDC*-R-*Hin*dIII CGCACGCAT**AAGCTT**ttaaacagcctgtactctctg

*yfgF*-F-*Eco*R1 AAGGAAAAAA**GAATTC**atgaaactgaatgcaacttatataaaaatacg

*yfgF*-R-*Hin*dIII CGCACGCAT**AAGCTT**ctaacgttgtaccggtgattcg

**Primers designed to delete genes using the protocol by Link, et al., 1997 [1]. For crossover primers (-Ni, -No, -Ci, -Co): a target homology is underlined and a restriction site is in bold. -Nout and -Cout primers anneal approximately 500 bp upsteam and downstream, respectively, of the target gene.**

b2077-Ni cacgcaataaccttcacactccaaatttataaccatttactcggttaccgtttgtttagg

b2077-No aaggaaaaaa**gcggccgc**cacggtgtatatcgtgctggg **(*Not*I restriction site)**

b2077-Ci gttataaatttggagtgtgaaggttattgcgtgagctatttcgcggcgaaaaagga

b2077-Co cgcacgcat**gtcgac**tatcagtattgcgcgttaaccgctc **(*Sal*I restriction site)**

b2077-Noutcacggtgtatatcgtgctggg

b2077-Cout tatcagtattgcgcgttaaccgctc

b2266-Ni cacgcaataaccttcacactccaaatttataaccattctcgttctccatttgcgtaa

b2266-No aaggaaaaaa**gcggccgc**tcactctgaattatcggtttcccag **(*Not*I restriction site)**

b2266-Ci gttataaatttggagtgtgaaggttattgcgtgtaaaacctccctacaccggg

b2266-Co cgcacgcat**gtcgac**aatcgcatcgtgctgaaggga **(*Sal*I restriction site)**

b2266-Nout gcagtcaaacaaccaaagtccgctc

b2266-Cout taattgcgtccagcccgttttgtcc

*fimE*-Ni cacgcaataaccttcacactccaaatttataaccacaatagtagtactcctaactgagatatatttgaat

*fimE*-No aaggaaaaaa**gcggccgc**acgacagcgtcacgctgttttataga **(*Not*I restriction site)**

*fimE*-Ci gttataaatttggagtgtgaaggttattggtgtgatttaacttattgataataaagttaaaaaaacaaataaatacaagacaattgg

*fimE*-Co cgcacgcat**gtcgac**tgccagagttttaattttcatgctgctttc **(*Sal*I restriction site)**

*fimE*-Nout attcatccgcacatgttacgcc

*fimE*-Cout tgaatgttaaaaccgacagcag

*lacZ*-Ni cacgcaataaccttcacactccaaatttataaccatagctgtttcctgtgtgaaattgttatc

*lacZ*-No aaggaaaaaa**gcggccgc**cgttcccactgcgatgc **(*Not*I restriction site)**

*lacZ*-Ci gttataaatttggagtgtgaaggttattgcgtgtaataataaccgggcaggccatgtc

*lacZ*-Co cgcacgcat**gtcgac**acagccaaacatccgcgc **(*Sal*I restriction site)**

*lacZ*-Nout tcgcaatcaaattcagccgatagcggaac

*lacZ*-Cout acagccagagcccagccagaaaacaaac

*perR*-Ni cacgcaataaccttcacactccaaatttataaccattcatgaatccttttcactagggat

*perR*-No aaggaaaaaa**gcggccgc**tatttcactgaagcctgttccgttct **(*Not*I restriction site)**

*perR*-Ci gttataaatttggagtgtgaaggttattgcgtgtgatcatgttcacattaatcggggc

*perR*-Co cgcacgcat**gtcgac**acagggcattgcacagactg **(*Sal*I restriction site)**

*perR*-Nouttatttcactgaagcctgttccgttct

*perR*-Cout acagggcattgcacagactg

*rcsD*-Ni cacgcaataaccttcacactccaaatttataaccattcgtgtttatgacctgttaaaacttc

*rcsD*-No aaggaaaaaa**gcggccgc**ataattcaaggttaaaatcaataacttattcttaagtatttgacag **(*Not*I restriction site)**

*rcsD*-Ci gttataaatttggagtgtgaaggttattgcgtgagagcttgctgtagcaaggtagc

*rcsD*-Co cgcacgcat**gtcgac**tcactctcttttggcgagagac **(*Sal*I restriction site)**

*rcsD*-Nout ccccaaaaatgcagaataatccaac

*rcsD*-Cout atcgcagatttcttctggctac

*yeeD*-Ni cacgcaataaccttcacactccaaatttataaccatctttacaccttacttaatttgccgca

*yeeD*-No aaggaaaaaa**gcggccgc**catattctgtttgaaaaacgctggcatc **(*Not*I restriction site)**

*yeeD*-Ci gttataaatttggagtgtgaaggttattgcgtgtgactcaacattgtcctccgc

*yeeD*-Co cgcacgcat**gtcgac**aattaatcgtcagcattgcctcga **(*Sal*I restriction site)**

*yeeD*-Nout catattctgtttgaaaaacgctggcatc

*yeeD*-Cout aattaatcgtcagcattgcctcga

*ygcQ*-Ni cacgcaataaccttcacactccaaatttataacattcatggctgcatcctttgg

*ygcQ*-No aaggaaaaaa**gcggccgc**ggcggcagatctgcg **(*Not*I restriction site)**

*ygcQ*–Ci gttataaatttggagtgtgaaggttattgcgtgtaacgtgttgccggatgatcc

*ygcQ*–Co cgcacgcat**gtcgac**tttgaaactggtgaccgaggc **(*Sal*I restriction site)**

*ygcQ*-Nout accctcgaacagcgtactgaac

*ygcQ*-Cout tgacagagaaaatccgccaacc

*yhjH*-Ni cacgcaataaccttcacactccaaatttataacgataacctgccttatcatcaaagatgtc

*yhjH*-No aaggaaaaaa**gcggccgc**gacggttttccatccgttgg **(*Not*I restriction site)**

*yhjH*-Ci gttataaatttggagtgtgaaggttattgcgtgtaagctgcctcattttccgcct

*yhjH*-Co cgcacgcat**gtcgac**agattaaacgtccagttattgttcttttcaga **(*Sal*I restriction site)**

*yhjH*-Nout ttcgccagctcttcgcaaatcgcc

*yhjH*-Cout cgcccaccttttctttatccgctttac

*yfiR*-Ni cacgcaataaccttcacactccaaatttataaccattcagggatccccacca

*yfiR*-No aaggaaaaaa**gcggccgc**cttgttggctttactggttagcgga **(*Not*I restriction site)**

*yfiR*-Ci gttataaatttggagtgtgaaggttattgcgtgcggatgtcttaatgctcgcacgg

*yfiR*-Co cgcacgcat**gtcgac**ccagataaaatggctgattgaactgtcg **(*Sal*I restriction site)**

*yfiR*-Nout tcgtttgcgatagttgatcc

*yfiR*-Cout gtcttccagactcactctcc

*yihP*-Ni cacgcaataaccttcacactccaaatttataaccatgagtttccccacggg

*yihP*-No aaggaaaaaa**gcggccgc**ctgcgctggtgcgatttc **(*Not*I restriction site)**

*yihP*-Ci gttataaatttggagtgtgaaggttattgcgtgtaataataataaacgacgccctgcgg

*yihP*-Co cgcacgcat**gtcgac**gcgcgctcattcggg **(*Sal*I restriction site)**

*yihP*-Nout ctgcgctggtgcgatttc

*yihP*-Cout gcgcgctcattcggg

**Recombineering primers are designed to amplify the *kan* cassette from pKD4 for an in-frame insertion/deletion into the target gene using the protocol by Datsenko and Wanner, 2000 [2]; target homology is underlined and recombination target is in bold.**

**-Nout and -Cout primers anneal approximately 500 bp upsteam and downstream, respectively, of the target gene.**

*aer*-Red-Fwd **actctgacaagaagttaacaaccatataacctgcacaggacgcgaacatg**gtgtaggctggagctgcttc

*aer*-Red-Rev **gcatcgcatcaggcattgtgctccaaccgccggatccggcataccgatta**catatgaatatcctccttag

*aer*-Nout gcgcaaatgcacgttttcaggg

*aer*-Cout cgaagaggaaggaggtaagaagcag

*cheA*-Red-Fwd **acaggtcagtgttcccacaatgccatcagccgaaccgaggtgacagcgtg**gtgtaggctggagctgcttc

*cheA*-Red-Rev **ctttgttacattcgtcataccggtcatattgttacctttttactcattca**catatgaatatcctccttag

*cheB*-Red-Fwd **ttcacgctgcgtggtcagacggtgtatgcgctaagtaaggattaacgatg**gtgtaggctggagctgcttc

*cheB*-Red-Rev **cacaaccaaaaatttaagttctttatccgccatttcacactcctgattta**catatgaatatcctccttag

*cheB*-Nout cgaactatgttgattttgcccc

*cheB*-Cout atgttctctttcttcgcttctg

*cheY*-Red-Fwd **aaaattagtgccggacaggcgatacgtatttaaatcaggagtgtgaaatg**gtgtaggctggagctgcttc

*cheY*-Red-Rev **aatgctcgtcagcaggtttgattgatggttgcatcatagtcgcatcctca**catatgaatatcctccttag

*cheZ*-Red-Fwd **aaaactcaacaaaatctttgagaaactgggcatgtgaggatgcgactatg**gtgtaggctggagctgcttc

*cheZ*-Red-Rev **tcagaccgcctgatatgacgtggtcacgccacatcaggcaatacaaatca**catatgaatatcctccttag

*cls*-Red-Fwd **atatgcgtaaactcataacaatgcgctttcaaaaggatttctaatctatg**gtgtaggctggagctgcttc

*cls*-Red-Rev **gatccatatccatagttactacctgtttaacctctgttggcgacgtttta**catatgaatatcctccttag

*cls*-Nout cgctgtttgtttagaatgcacttcc

*cls*-Cout ttcaccatcttcactgtccgcc

*cpsB*-Red-Fwd **aaagagaacgtgttacgtcaatttataaatgatattcggggataattatg**gtgtaggctggagctgcttc

*cpsB*-Red-Rev **tgtcgttatttacaccgcggtttcgcattcattgcctgatgcgacgttta**catatgaatatcctccttag

*cpsB*-Nout cgtattgccgtcgaaactgacc

*cpsB*-Cout cgcatcctgtaaacctttcgcc

*envZ*-Red-Fwd **accgtctggggtctgggctacgtctttgtaccggacggctctaaagcatg**gtgtaggctggagctgcttc

*envZ*-Red-Rev **gtatcttatagaaagcaaaacgggaggcaccttcgcctcccgtttattta**catatgaatatcctccttag

*envZ*-Nout aaatgttccgcgaagacgagcc

*envZ*-Cout aaccttcactctgccgatgtttaacc

*fliC*-Red-Fwd **ggaaacccaatacgtaatcaacgacttgcaatataggataacgaatcatg**gtgtaggctggagctgcttc

*fliC*-Red-Rev **aggcaatttggcgttgccgtcagtctcagttaatcaggttacaacgatta**catatgaatatcctccttag

*fliT*-Red-Fwd **tggaaagagtcgttactctccccttctttgattcaggacccagtctgatg**gtgtaggctggagctgcttc

*fliT*-Red-Rev **agcgtagccgtaatcggattattcgcgagccatcgactcattcagattca**catatgaatatcctccttag

*fliT*-Nout gacaacaatcagcaaggcaaag

*fliT*-Cout tgactaccacatccaacagcac

*galU*-Red-Fwd **cagaaatatgaacacgttcaaaacacgaacagtccaggagaatttaaatg**gtgtaggctggagctgcttc

*galU*-Red-Rev **ggcgtcgattgctcaacgccgtttcgtggataacaccgatacggatgtta**catatgaatatcctccttag

*gmhA*-Red-Fwd **cggtacactgcattttgtctattacatttatgctgaaggatatcctcatg**gtgtaggctggagctgcttc

*gmhA*-Red-Rev **acaaatgccggatgcggcgtaaacgtcttatccggcctacgccagactta**catatgaatatcctccttag

*gmhA*-Nout aatcatcataacgaaaagcccc

*gmhA*-Cout ttcgtaaaaggtaatgccccag

*gmhB*-Red-Fwd **aaacatgcgatactagcgtcacatgccttattaaggagctataaaaggtg**gtgtaggctggagctgcttc

*gmhB*-Red-Rev **aagacaagcggaaaaatgcatttttatttcaaccgctcatcttttaatca**catatgaatatcctccttag

*gmhB*-Nout acaacgtataagcgtactcttacc

*gmhB*-Cout cgtcttgcgacgttaagaatcc

*hdfR*-Red-Fwd **aacaaaacatttaaatcataacgacaaataattttgcggagagcactgtg**gtgtaggctggagctgcttc

*hdfR*-Red-Rev **ctctccgaagtaaatccttctaccggcatccttgccagccattcatatta**catatgaatatcctccttag

*hdfR*-Nout aatcaccatgacgagagaatcc

*hdfR*-Cout gcatcaaattaagcagtaagcc

*hldD*-Red-Fwd **ttcgtgtctgagattgtctctgactccataattcgaaggttacagttatg**gtgtaggctggagctgcttc

*hldD*-Red-Rev **tcgccaacccaagacgggccgatcaccagtattttcatgcagagctctta**catatgaatatcctccttag

*hldD*-Nout ccctttattagcagtccaatcccctc

*hldD*-Cout tttcacgcaggctatgacccag

*hldE*-Red-Fwd **agtatggtattatcgcgcgcaaattttgaatctctcaggagacaggaatg**gtgtaggctggagctgcttc

*hldE*-Red-Rev **caataggcctgccatgtacgaagcgagatctgtgaaccgctttccggtta**catatgaatatcctccttag

*hldE*-Nout cgcaaaacgacattatggaagag

*hldE*-Cout tcatcaacaatcggggagtcag

*ompR*-Red-Fwd **aagaatacacgcttacaaattgttgcgaacctttgggagtacaaacaatg**gtgtaggctggagctgcttc

*ompR*-Red-Rev **caataacgtacgggcaaatgaacttcgtggcgagaagcgcaatcgcctca**catatgaatatcctccttag

*ompR*-Nout gcgttttcatctcgttgattcc

*ompR*-Cout taagaattcatagtgttgcgcc

*pgi*-Red-Fwd **tacaatcttccaaagtcacaattctcaaaatcagaagagtattgctaatg**gtgtaggctggagctgcttc

*pgi*-Red-Rev **gccggatgcggcgtgaacgccttatccggcctacatatcgacgatgatta**catatgaatatcctccttag

*pgi*-Nout cttcgctactattttcacccag

*pgi*-Cout ttaacctcacggtatgatttcc

*pgm*-Red-Fwd **gaaggtttgcggaactatctaaaacgttgcagacaaaggacaaagcaatg**gtgtaggctggagctgcttc

*pgm*-Red-Rev **cgtaaaaaagggcgatcttgcgaccgccctttttttattaaatgtgttta**catatgaatatcctccttag

*pgm*-Nout ctacactatattctcttgacgccc

*pgm*-Cout gacactatgacgaccagactcc

*phsC*-Red-Fwd **catctgtatcgccggttcggtcaacatttgattaaaaaggaaaatgtatg**gtgtaggctggagctgcttc

*phsC*-Red-Rev **gctccgatacgccattctcgcaggtctgcttgtgtaatgatcattcgtta**catatgaatatcctccttag

*phsC*-Nout ttcgctaccttaaccctgtcac

*phsC*-Cout ttccaatccgcacgctataacc

*rcsB*-Red-Fwd **cattgacagttatgtcaagagcttgctgtagcaaggtagcctattacatg**gtgtaggctggagctgcttc

*rcsB*-Red-Rev **caaatgccagataagacactaacgcgtcttatctggcctacaggtgatta**catatgaatatcctccttag

*rcsB*-Nout gacacagtaccggatgatgttaag

*rcsB*-Cout cgttatatgccgagagggtcag

*rcsC*-Red-Fwd **tgaaataccttgcttcttttcgtacaaccctgaaagcctcgcgctacatg**gtgtaggctggagctgcttc

*rcsC*-Red-Rev **tggcatttgcactgaatgccggatgcggcgtaaacgccttatccgtccta**catatgaatatcctccttag

*rcsC*-Nout ccttccgtttctacgatataacc

*rcsC*-Cout ctgaattatctctcttcagtgacc

*rcsF*-Red-Fwd **gctcctgattcaatattgacgttttgatcatacattgaggaaatactatg**gtgtaggctggagctgcttc

*rcsF*-Red-Rev **tttatagggcgagcgaataacgcctatttgctcgaactggaaactgctca**catatgaatatcctccttag

*rcsF*-Nout gtgaagataacaaagacgccgag

*rcsF*-Cout tgggttagggcggaaagtagag

*rhaD*-Red-Fwd **ctacgggtcgtgcatccgacaacaccgaatttacaggaacacagaacatg**gtgtaggctggagctgcttc

*rhaD*-Red-Rev **tcggggtttacctgcatgacaaaggctttgcggatcatgtttgctcctta**catatgaatatcctccttag

*tap*-Red-Fwd **gacgagtatttactaacgcggtcattgccgcctgatggggagcgttgatg**gtgtaggctggagctgcttc

*tap*-Red-Rev **gtttgcccacagggcagagatgaagtcatagcgccttctcaatcacttca**catatgaatatcctccttag

*tap*-Nout gcgagtcgtttaacgcaagcag

*tap*-Cout atgaccgaaatccgtcagtccc

*tar*-Red-Fwd **ccctccttgccgataacgagatcaacttgttttcaggaaggtgccttatg**gtgtaggctggagctgcttc

*tar*-Red-Rev **atcaacgctccccatcaggcggcaatgaccgcgttagtaaatactcgtca**catatgaatatcctccttag

*tar*-Nout gacgctttcaacagaatatctcac

*tar*-Cout caacgttttaatgtcatccgcc

*trg*-Red-Fwd **gccgatgactttctatcaggagtaaacctggacgagagacaacggtaatg**gtgtaggctggagctgcttc

*trg*-Red-Rev **gccgttctgaaaggtgaagggatctgtcgatccctccttgaacattttca**catatgaatatcctccttag

*trg*-Nout cttcatagcctttctccttgcc

*trg*-Cout ctgtctgcttcgctatctcgtc

*tsr*-Red-Fwd **cctttccaggccgaaaatcttgcatcggtccacaggaaagagaaaccatg**gtgtaggctggagctgcttc

*tsr*-Red-Rev **ctccttatgcccgataacattttgcttatcgggcattttcatggcgatta**catatgaatatcctccttag

*tsr*-Nout tgcgttgcgtttgaggaggtaaattg

*tsr*-Cout ttctgttctgccgcctttacgctg

*waaB*-Red-Fwd **gtcaacgattgtttctgattttatagacaaataaaaccgttaaaacagtg**gtgtaggctggagctgcttc

*waaB*-Red-Rev **aataactgaattaagaaactcagtttcctggaaaaacacctgctgcatta**catatgaatatcctccttag

*waaB*-Nout ttagccgagagattaacaacac

*waaB*-Cout aattccgcaaccaaatagaaag

*waaC*-Red-Fwd **tactggaagaactcaacgcgctattgttacaagaggaagcctgacggatg**gtgtaggctggagctgcttc

*waaC*-Red-Rev **taaggtttcaatgaatgaagtttaaaggatgttagcatgttttaccttta**catatgaatatcctccttag

*waaC*-Nout aagcggttatcctgattgcagc

*waaC*-Cout agcacgaaatggcgaattatctac

*waaF*-Red-Fwd **taacggaatacatggcctggctgaatcgcgacgcataagagctctgcatg**gtgtaggctggagctgcttc

*waaF*-Red-Rev **agaacatcgcccatcgacgatgttttaacgatcaaaacccgcatccgtca**catatgaatatcctccttag

*waaF*-Nout gtcgctttccatctcaacacc

*waaF*-Cout cacgaaacgctttgcgttcc

*waaG*-Red-Fwd **aagctgttgccagaagatgccccttcagctgacaggaatgcacaattatg**gtgtaggctggagctgcttc

*waaG*-Red-Rev **caaaagcatctttaccacgccaaagtgtggcaagcggctcttttaattca**catatgaatatcctccttag

*waaG*-Nout tgcgaaacaaaacccattactg

*waaG*-Cout tcattgtatcaacgccaacatc

waaI-Red-Fwd **gatagattacataaggtaattatttctgctatttcccggaggaaataatg**gtgtaggctggagctgcttc

waaI-Red-Rev **gagtccacaatgctacccttatatcattactttatagtttcccagtttta**catatgaatatcctccttag

waaI-Nout cccaatgaccctacttgaagcc

waaI-Cout gtacattgctcttgaccagacc

*waaJ*-Red-Fwd **agcattaaaactgggaaactataaagtaatgatataagggtagcattgtg**gtgtaggctggagctgcttc

*waaJ*-Red-Rev **caagtctttgatcttgctcttctgaatcataataaaccagttaaatgtta**catatgaatatcctccttag

*waaJ*-Nout taatcaaaaaaataacacatcc

*waaJ*-Cout tatcatcaatagaacgaaaaac

*waaK*-Red-Fwd **tcttatgctaattaatcatcctgaaactaaaataatatggtataaaaatg**gtgtaggctggagctgcttc

*waaK*-Red-Rev **caatacaattaattaagaataaacaagtttaagaagtgagttaaaactca**catatgaatatcctccttag

*waaK*-Nout gcaattcaaatcgcatattcac

*waaK*-Cout ccacacttttcctctatttttc

*waaP*-Red-Fwd **gtatagcttgccagaaaaagccgcggatatcattacaggtggtttagatg**gtgtaggctggagctgcttc

*waaP*-Red-Rev **taaatagtcataataaagttagttccagtacatactaataaatattttta**catatgaatatcctccttag

*waaP*-Nout caggataagccgcgaaaatttgaag

*waaP*-Cout cttgatgaataatcgccccagcc

*waaQ*-Red-Fwd **aagagtcgctagtggaaaagccatttcgaaaaatcctggtcataaagatg**gtgtaggctggagctgcttc

*waaQ*-Red-Rev **ttgaagcccaccaaatggaaaatatttatataaacaaaacgccacgatca**catatgaatatcctccttag

*waaQ*-Nout tcggccccattttcaaatctac

*waaQ*-Cout ccaggcatcttattaaacccaac

*waaY*-Red-Fwd **tatctttgccgaaaatattaccgtaaataacatttaactggtttattatg**gtgtaggctggagctgcttc

*waaY*-Red-Rev **tccgcttaaaactgtcctggtgaagacatgtaattgtgggatttttttta**catatgaatatcctccttag

*waaY*-Nout aaaagacaaaacacatcaaaac

*waaY*-Cout accattgacagcaataatatcc

*ybhC*-Red-Fwd **caggcttcaacggattcatttttctatttcatagcccggagcaacctgtg**gtgtaggctggagctgcttc

*ybhC*-Red-Rev **ggccggataaggcgtttacgccgcatccggcaaatagttaattgctctta**catatgaatatcctccttag

*ybhC*-Nout actcatcgctacatttttaccgttc

*ybhC*-Cout aggtcgcattcggcacttattg

*yheJ*-Red-Fwd **agcgagagaagagtcgccagctcagacgcaggccgggaataataaccatg**gtgtaggctggagctgcttc

*yheJ*-Red-Rev **ggaagaacgtatgaccatcaacgattcaggcatcacgatccttatgatta**catatgaatatcctccttag

*yheJ*-Nout tcctctcagtgaagcacaaacc

*yheJ*-Cout ctccgactgaatgcctatcacc

*yhhQ*-Red-Fwd **tacgtattgggttccctcaccccaatggttaatcaaaaaggtacaatatg**gtgtaggctggagctgcttc

*yhhQ*-Red-Rev **CATAACGGCTCATTCATCCATCTTATCACAACTCTGATAACGAACCTTTA**catatgaatatcctccttag

*yhhQ*-Nout cgataatcagcaacgtttcgcc

*yhhQ*-Cout atgacgatgactgctttctgcc

*yiaM*-Red-Fwd **tgcacatgcgacttgaattatgacagacatagcctcaaggaatagctatg**gtgtaggctggagctgcttc

*yiaM*-Red-Rev **agcaataccacccaacagacagcccagaaaaatcagcacagccatgatta**catatgaatatcctccttag

*yiaM*-Nout cgggaaataataaagtcagcgaatc

*yiaM*-Cout tttatgccccaccagtttcatc

*yihM*-Red-Fwd **ttggcgatttgaggccgtagacctcatcattaatctgtaggtgttttatg**gtgtaggctggagctgcttc

*yihM*-Red-Rev **CCATTCATATGGAATGGTTTTATTAACTGCGTATGAGTTAAAACTTATTA**catatgaatatcctccttag

*yihM*-Nout caactgaactctatcgcatcac

*yihM*-Cout ccgacatagcattaccaatttgac

*yjgI*-Red-Fwd **taaaacagttttgtaatgcatgttacataataaatcaaggagtccttatg**gtgtaggctggagctgcttc

*yjgI*-Red-Rev **aacccagacatcatggataatggctgggcttaattgagcgtagtcggtta**catatgaatatcctccttag

*yjgI*-Nout cgccgcttcttttaatacctcaac

*yjgI*-Cout tcctctcgacttcctacttgcc

*yjgX*-Red-Fwd **ctagaaccggttcagaacctacagaaaacactacaggagaaagcaaagtg**gtgtaggctggagctgcttc

*yjgX*-Red-Rev **AAACTGTCTGCCGGTATATTCCTCTCTCCCTTAAAAACCATAACAGGTTA**catatgaatatcctccttag

*yjgX*-Nout gaccgggaagagagtgagaaag

*yjgX*-Cout ataacgaatggcatccgcatag

*ykfF*-Red-Fwd **cgacagctagcaggctgccggggttttcttttatcaggagcccgaaaatg**gtgtaggctggagctgcttc

*ykfF*-Red-Rev **gatataaagtgtgttcggggaggtgaatgcgggtaaatgcttcgcgatca**catatgaatatcctccttag

*ykfF*-Nout ctatcagcattcagtctttcttacc

*ykfF*-Cout tgtagaacgaccagataccacc

*ynaK*-Red-Fwd **agtagcactggctgctggggtgcgttttattcataaagcaaggctgtatg**gtgtaggctggagctgcttc

*ynaK*-Red-Rev **tctcaatgtggcgacggattaatgcattacgggagcgatactgatcgtta**catatgaatatcctccttag

*ynaK*-Nout cacgagataaatcagctttctcatcc

*ynaK*-Cout cctcaacaccattaaccagttcacc

*yniA*-Red-Fwd **ttcttgcgctaaccttatgatctggcagacaacatgggagagacatcatg**gtgtaggctggagctgcttc

*yniA*-Red-Rev **tatttaatcaaaaggccgcacggagcggccattatcctcaacccatatca**catatgaatatcctccttag

*yniA*-Nout ggatgatgagggaaatatccatgag

*yniA*-Cout ggaaaaagccaaaggggaagag

1. Link AJ, Phillips D, Church GM (1997) Methods for generating precise deletions and insertions in the genome of wild-type *Escherichia coli*: application to open reading frame characterization. J Bacteriol 179: 6228-6237.

2. Datsenko KA, Wanner BL (2000) One-step inactivation of chromosomal genes in *Escherichia coli* K-12 using PCR products. Proc Natl Acad Sci U S A 97: 6640-6645.
